# Supplementary material for: Characterization of Ebola Virus–Associated Eye Disease
Source: PubMed Central journal article supplement (PMC7786253; doi:10.1001/jamanetworkopen.2020.32216), 2021-01-05
Supplement: jamanetwopen-e2032216-s001.pdf [file jamanetwopen-e2032216-s001.pdf]

## Supplementary Online Content

Eghrari AO, Bishop RJ, Ross RD, et al. Characterization of Ebola virus–associated eye disease. *JAMA Netw Open*. 2020;4(1):e2032216. doi:10.1001/jamanetworkopen.2020.32216

**eTable 1.** Baseline Demographic and Clinical Characteristics of Survivors and Close Contacts

**eTable 2.** Clinical Characteristics of Ebola Virus Disease Survivors With and Without Uveitis

**eFigure.** Standard Optical Coherence Tomography Images Viewed by Examiners to Guide Subjective Grading of the Level of Vitreous Opacities in the PREVAIL III Eye Substudy

This supplementary material has been provided by the authors to give readers additional information about their work.

eTable 1: Baseline demographic and clinical characteristics of survivors and close contacts

|                                           | Survivors<br>(N=564) | N with data | Close<br>Contacts<br>(N=635) | N with data | p-value | Odds Ratio (95%<br>CI) |
|-------------------------------------------|----------------------|-------------|------------------------------|-------------|---------|------------------------|
| <b>Demographics</b>                       |                      |             |                              |             |         |                        |
| Female                                    | 320 (56.7%)          | 564         | 347 (54.6%)                  | 635         | 0.49    | 1.09 (0.85, 1.39)      |
| Age (years) Mean<br>(SD)                  | 30.3 (14)            | 564         | 25.8 (15.5)                  | 635         | < 0.001 | 1.02 (1.01,1.03)       |
| <b>Age category</b>                       |                      |             |                              |             |         |                        |
| < 18 years                                | 101 (17.9%)          | -           | 232 (36.5%)                  | -           | -       | -                      |
| 18-45 years                               | 375 (66.5%)          | -           | 321 (50.6%)                  | -           | < 0.001 | -                      |
| > 45 years                                | 88 (15.6%)           | -           | 82 (12.9%)                   | -           | -       | -                      |
| HIV seropositive                          | 9 (1.7%)             | 515         | 12 (2.4%)                    | 505         | 0.43    | 0.71 (0.3, 1.67)       |
| Syphilis seropositive                     | 23 (4.5%)            | 515         | 20 (4%)                      | 505         | 0.8     | 1.08 (0.58, 2.03)      |
| <b>Previous eye problems</b>              |                      |             |                              |             |         |                        |
| Eye problems                              | 400 (71%)            | 563         | 469 (73.9%)                  | 635         | 0.02    | 0.72 (0.55, 0.95)      |
| Surgery                                   | 7 (1.2%)             | 563         | 5 (0.8%)                     | 635         | 0.58    | 1.39 (0.43, 4.51)      |
| Infection                                 | 168 (35.6%)          | 472         | 169 (38.8%)                  | 436         | 0.26    | 0.85 (0.64, 1.13)      |
| Trauma                                    | 95 (20.1%)           | 472         | 126 (28.9%)                  | 436         | 0.006   | 0.64 (0.47, 0.88)      |
| Medication use                            | 216 (45.9%)          | 471         | 188 (43.1%)                  | 436         | 0.57    | 1.08 (0.83, 1.41)      |
| <b>Complaints at baseline</b>             |                      |             |                              |             |         |                        |
| Trouble seeing                            | 276 (49.1%)          | 562         | 229 (36.1%)                  | 635         | 0.008   | 1.45 (1.1, 1.9)        |
| Eye pain                                  | 194 (34.6%)          | 561         | 184 (29%)                    | 634         | 0.11    | 1.23 (0.95, 1.59)      |
| Light sensitivity                         | 276 (49.1%)          | 562         | 254 (40.1%)                  | 634         | 0.01    | 1.36 (1.06, 1.74)      |
| Redness                                   | 144 (25.6%)          | 562         | 117 (18.4%)                  | 635         | 0.008   | 1.46 (1.1, 1.93)       |
| Discharge                                 | 102 (21.7%)          | 471         | 104 (23.9%)                  | 436         | 0.43    | 0.88 (0.63, 1.21)      |
| <b>Enrollment</b>                         |                      |             |                              |             |         |                        |
| Mean Enrollment to<br>eye exam, days (SD) | 100 (94)             | 564         | 64 (62.5)                    | 635         | < 0.001 | 38.8 (28.66,<br>48.93) |

Estimates are adjusted for age, sex, and relationships among survivors and close contacts. SD: Standard Deviation

| <b>eTable 2. Clinical characteristics of Ebola virus disease survivors with and without uveitis</b> |                                                        |                             |                                 |
|-----------------------------------------------------------------------------------------------------|--------------------------------------------------------|-----------------------------|---------------------------------|
|                                                                                                     | <b>Uveitis (N=149)</b>                                 | <b>No uveitis (N=415)</b>   | <b>Effect Estimate (95% CI)</b> |
|                                                                                                     | <b>Demographics</b>                                    |                             | <b>Odds ratio</b>               |
| <b>Age (yrs) Median (IQR)</b>                                                                       | 32 (24-43)                                             | 28 (19.5-38)                | 1.02 (1.01, 1.03)               |
| <b>Female</b>                                                                                       | 78 (52.3%)                                             | 242 (58.3%)                 | 0.78 (0.54, 1.15)               |
|                                                                                                     | <b>Antibody level (EU)</b>                             |                             | <b>Mean Difference</b>          |
| <b>Median (IQR)</b>                                                                                 | 19910 (13950-29960)                                    | 19420 (12000-34350)         | 15.42 (-4456.25, 4487.09)       |
| <b>Mean (SD)</b>                                                                                    | 25870 (23672)                                          | 26970 (23996) 28350 (25989) |                                 |
|                                                                                                     | <b>Ebola Treatment Unit Stay (days)</b>                |                             | <b>Mean difference</b>          |
| <b>Median (IQR)</b>                                                                                 | 18.5 (12.25-21.75)                                     | 15 (11-19)                  | 2.69 (1.15, 4.24)               |
| <b>Mean (SD)</b>                                                                                    | 17.97 (7.7)                                            | 15.32 (6.98)                |                                 |
|                                                                                                     | <b>Symptom onset to enrollment (days)</b>              |                             | <b>Mean difference</b>          |
| <b>Median (IQR)</b>                                                                                 | 335 (286-367)                                          | 338 (293.2-385)             | -3.39 (-16.44, 9.65)            |
| <b>Mean (SD)</b>                                                                                    | 334.9 (69.3)                                           | 342.4 (71.2)                |                                 |
|                                                                                                     | <b>Symptom onset to eye exam (days)</b>                |                             | <b>Mean difference</b>          |
| <b>Median (IQR)</b>                                                                                 | 412 (310-528)                                          | 470 (332-538.5)             | -19.5 (-41.8, 2.76)             |
| <b>Mean (SD)</b>                                                                                    | 421.4 (119)                                            | 447.5 (121)                 |                                 |
|                                                                                                     | <b>Percent of acute symptoms reported <sup>3</sup></b> |                             | <b>Mean difference</b>          |
| <b>Median (IQR)</b>                                                                                 | 68.75 (56.25-81.25)                                    | 68.75 (56.25-81.25)         | 0.99 (-2.72, 4.71)              |
| <b>Mean (SD)</b>                                                                                    | 68.62 (18.9)                                           | 67.66 (20.1)                |                                 |
|                                                                                                     | <b>Eye symptoms</b>                                    |                             | <b>Odds ratio</b>               |
| <b>Trouble Seeing</b>                                                                               | 100 (67.6%)                                            | 176 (42.5%)                 | 2.69 (1.78, 4.07)               |
| <b>Pain in eye</b>                                                                                  | 68 (45.9%)                                             | 126 (30.5%)                 | 2.06 (1.39, 3.05)               |
| <b>Sensitivity to light</b>                                                                         | 82 (55.4%)                                             | 194 (46.9%)                 | 1.43 (0.97, 2.1)                |
| <b>Redness</b>                                                                                      | 39 (26.4%)                                             | 105 (25.4%)                 | 1.01 (0.65, 1.55)               |
| <b>Discharge</b>                                                                                    | 29 (22.1%)                                             | 73 (21.5%)                  | 1.05 (0.64, 1.71)               |

|                                                                         | <b>Visual Acuity</b>                |                    | <b>Mean difference</b> |
|-------------------------------------------------------------------------|-------------------------------------|--------------------|------------------------|
| <b>Median (IQR)</b>                                                     | 25 (20-44.72)                       | 20 (20-25)         | 18.49 (-5.56, 42.55)   |
| <b>Mean (SD)</b>                                                        | 61 (119)                            | 38 (130)           |                        |
|                                                                         | <b>Best Corrected Visual Acuity</b> |                    | <b>Mean difference</b> |
| <b>Median (IQR)</b>                                                     | 22.36 (20-32.84)                    | 20 (20-25)         | 12.57 (-10.36, 35.5)   |
| <b>Mean (SD)</b>                                                        | 49.61 (98)                          | 34.36 (128)        |                        |
|                                                                         | <b>Pinhole visual acuity</b>        |                    | <b>Mean difference</b> |
| <b>Median (IQR)</b>                                                     | 35.5 (22.36-50)                     | 25 (20-32)         | 18.87 (-4.81, 42.55)   |
| <b>Mean (SD)</b>                                                        | 56.14 (81.3)                        | 37.23 (60.6)       |                        |
|                                                                         | <b>Color vision (plates)</b>        |                    | <b>Mean difference</b> |
| <b>Median (IQR)</b>                                                     | 14 (13-14)                          | 14 (13.49-14)      | -0.48 (-0.96, 0)       |
| <b>Mean (SD)</b>                                                        | 12.69 (3.3)                         | 13.26 (2.14)       |                        |
|                                                                         | <b>Intraocular pressure (mmHg)</b>  |                    | <b>Mean difference</b> |
| <b>Median (IQR)</b>                                                     | 11.96 (10-13.96)                    | 12.49 (10.46-14.7) | -0.7 (-1.36, -0.04)    |
| <b>Mean (SD)</b>                                                        | 12.15 (3.03)                        | 12.86 (3.65)       |                        |
|                                                                         | <b>Ocular coherence tomography</b>  |                    | <b>Odds Ratio</b>      |
| <b>Mild or greater vitreous opacities</b>                               | 61 (47.3%)                          | 106 (27.6%)        | 2.2 (1.45, 3.34)       |
| <b>Intraretinal fluid <sup>1</sup></b>                                  | 13 (10.2%)                          | 8 (2.1%)           | 4.75 (1.88, 11.97)     |
| <b>Epiretinal membrane</b>                                              | 9 (11.7%)                           | 6 (2.3%)           | 5.12 (1.73, 15.16)     |
| <b>Subretinal fluid <sup>1</sup></b>                                    | 2 (50%)                             | 2 (1.6%)           | 2.51 (0.18, 35.49)     |
|                                                                         | <b>Central subfield thickness</b>   |                    | <b>Odds Ratio</b>      |
| <b>Median (IQR)</b>                                                     | 222 (210-236)                       | 220.5 (210-233.5)  | -1.35 (-6.43, 3.74)    |
| <b>Mean (SD)</b>                                                        | 222.1 (23.3)                        | 222.6 (19.6)       |                        |
|                                                                         | <b>Lab measurements</b>             |                    | <b>Odds Ratio</b>      |
| <b>At least 1 positive semen result for Ebola virus RNA<sup>2</sup></b> | 26 (50%)                            | 31 (29.5%)         | 2.24 (1.12, 4.48)      |
| <b>HIV seropositive <sup>1</sup></b>                                    | 0 (0%)                              | 9 (2.4%)           | 0 (0, 1.33)            |

|                              |           |           |                  |
|------------------------------|-----------|-----------|------------------|
| <b>Syphilis seropositive</b> | 7 (30.4%) | 16 (4.3%) | 1.02 (0.4, 2.56) |
|------------------------------|-----------|-----------|------------------|

**Supplemental Table 2.** Clinical characteristics of Ebola virus disease survivors with and without uveitis. Compared to survivors without uveitis, uveitis patients were more likely to be older, to have a longer stay in the Ebola Treatment Unit, to experience eye pain and trouble seeing, and to have optical coherence tomography findings of mild or greater vitreous opacities, intraretinal fluid, and epiretinal membrane.

**eFigure 1.**

Standard optical coherence tomography images viewed by examiners to guide subjective grading of the level of vitreous opacities in the PREVAIL III Eye Substudy. These images are of the eyes of participants from within the local population during the first week of the study.

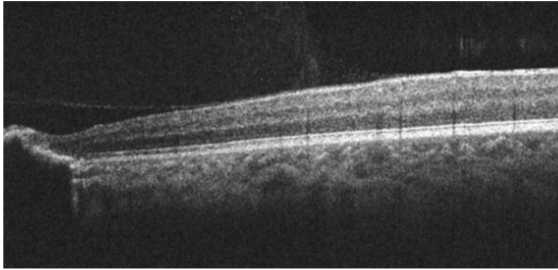

“None to minimal vitreous opacities”

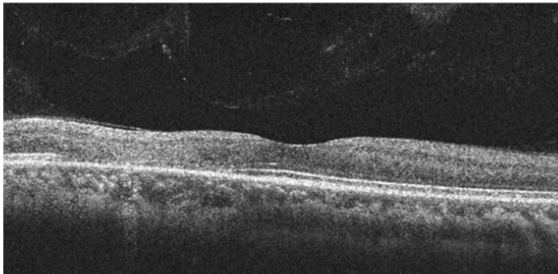

“Mild vitreous opacities”

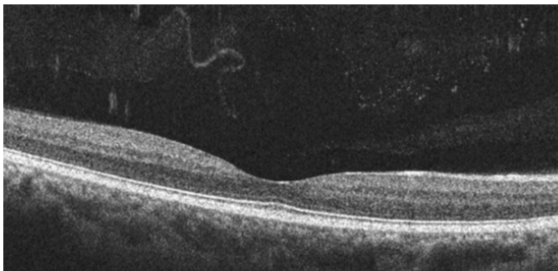

“Moderate to severe vitreous opacities”
